# Supplementary material
Source: MDPI journal article supplement (https://www.mdpi.com/2073-4441/11/9/1770)
Supplement: s1 [file s1]

## **The Online web-based survey questionnaire**

The specific web-address of the online post that announced the survey is <https://docs.google.com/forms/d/e/1FAIpQLSdlwLDNs5Qxj1sQNBzu0H9YoKdOnQhpongP9YPjjGOvSHeBA/viewform>. Below you can see the entire translated questionnaire, with the original structure and order of questions. Note, however, that not all the questions have been used in this analysis. The type of the survey questions were closed-ended questions: rating scale (Likert-type scales and semantic differential scales), multiple choice questions, dichotomous and demographic questions. More details about the synthesis of the variables are provided in the article.

**Title: ‘Questionnaire on natural hazards’**

### **Section 1. INTRODUCTION**

Natural phenomena such as floods, forest fires and earthquakes have caused disasters and dozens of human casualties, while endangering the lives and property of citizens across the country. The purpose of the questionnaire is to capture and measure the perception and level of information and awareness of citizens about natural hazards, as well as their confidence in the existing risk management framework. The duration of the questionnaire does not exceed 5-10 minutes. Your participation will help us in particular to understand the role of the human factor in the magnitude of the natural disasters in Greece. This study is being carried out by the Institute of Environmental and Sustainable Development of the National Observatory of Athens and the Department of Geology and Geoenvironment of the NRC, in the framework of European Programs.

### **Section 2. THREAT PERCEPTIONS**

**WORRY:**

**Qu.1.** Rate the hazards<sup>1</sup> below based on the level of worry you feel about them:

**5-point Likert scale**

**From ‘not at all’-1 to ‘very much’-5**

<sup>1</sup>**Hazards Grid** [List of hazards, hereinafter ‘**Hazards Grid**’, ordered as follows]:

- Flood
- Rainstorm/hailstorm/windstorm
- Earthquake
- Heatwave
- Landslide/debris flow/falls
- Drought
- Wildfire
- Volcanic eruption
- Frost

**LIKELIHOOD OF OCCURRENCE:**

**Qu.2.** How likely is it that the following disasters will occur in your area over the next 5 years?

**Hazards Grid**

**5-point Likert scale**

**From ‘not at all’-1 to ‘very much’-5**

**Risk perception:**

**Qu.3.** In the event any of these disasters occurs, how serious do you assess the risk to you and your families?

**Hazards Grid**

**5-point Likert scale**

**From 'not at all'-1 to 'very much'-5**

**Section 3. EXPERIENCE**

**Disaster experience:**

**Qu.4.** Have you experienced a natural disaster that has affected you, your family or property, or your area?

**Yes**

**No**

**Don't remember-don't know**

**Qu.5.** If so, when did you last experience disaster?

**Hazards Grid**

**Last year**

**Last 5 years**

**More than 5 years**

**Section 4. PRECAUTIONARY MEASURES – COPING CAPACITY**

**Preparedness:**

**Qu.6.** Which of the following have you done to protect yourselves against natural disasters?

- Clean gutter and downspout
- Keep sandbags for flood prevention
- Store generators
- Keep emergency kit
- Plan family emergency response
- Garden modifications
- Keep fire extinguisher
- Property modifications
- Other
- None

**Multiple choice**

**Coping Capacity:**

**Qu.7.** To what extent do you think the measures you have taken can protect you from the following natural hazards' risks?

**Hazards Grid**

**5-point Likert scale**

**From 'very small'-1 to 'very large extent'-5**

**Insurance purchase:**

**Qu.8.** Do you have any insurance coverage for a natural disaster on your property?

**Yes**

**Yes due to loan requirement**

**No**

**Don't remember-don't know**

**Sections 5-6. AWARENESS – TRUST – COPING APPRAISALS**

**Qu.9.** In the event of a disaster, who do you think is best suited to inform you of the situation in your area?

**Free text**

**Access on information:**

**Qu.10.** Have you attended an awareness event or were you informed of ways to protect yourself from a brochure, newsletter or other material?

**Yes**

**No**

**Don't remember**

**Access on exercise:**

**Qu.11.** Have you ever participated in an emergency exercise (excluding earthquakes)?

**Yes**

**No**

**Don't remember**

**Access on SOS number:**

**Qu.12.** Do you know which phone number you can contact for an emergency?

**Free text**

**Self-assessed knowledge:**

**Qu.13.** How do you assess your level of knowledge on hydrometeorological disasters (eg due to flooding / heavy rainfall / high winds / landslides / extreme temperature)?

**5-point Likert scale**

**From 'very low'-1 to 'very high'-5**

**Qu.14.** Do you know what natural hazards warnings are issued?

**Hazards Grid**

**Multiple choice**

**Trust in warnings:**

**Qu.15.** How do you assess the level of warnings about the following natural disasters by the state regarding their credibility?

**Hazards Grid**

**5-point Likert scale**

**From 'very inefficient'-1 to 'very efficient'-5**

**Qu.16.** Which of the following disasters is going to increase or decrease in the future?

**Hazards Grid**

**Will increase**

**Will decrease**

**Neither**

**Qu.17.** If you answered that they would increase, what do you think the increase would be due to?

**Climate change**

**5-point Likert scale**

**Land-use change**

**From 'not at all'-1 to 'very much'-5**

**Poor human workmanship/illegal interventions**

**Trust in authorities:**

**Qu.18.** To what extent you trust the authorities for protection from natural disasters?

**5-point Likert scale**

**From 'very small'-1 to 'very large extent'-5**

**Qu.19.** To what extent do you trust the following on informing you about natural disasters?

**Government & officials**

**5-point Likert scale**

**Local authorities**

**From 'very small'-1 to 'very large extent'-5**

**Media**

**Research entities**

**Social circle**

**Perceived emergency response efficacy:**

**Qu.20.** To what extent do you know what to do if the following disasters occur?

**Hazards Grid**

**5-point Likert scale**

**From 'very small'-1 to 'very large extent'-5**

### **Cost-response capacity**

**Qu.21.** To what extent do you think you can meet the financial requirements to prepare for the following disasters?

**Hazards Grid**

**5-point Likert scale**

**From 'very small'-1 to 'very large extent'-5**

### **Section 7. DEMOGRAPHICS**

**Qu.22. Age (single choice)**

15-24 / 25-34 / 35-44 / 45-54 / 55-64 / 65-74 / >75

**Qu.23. Gender (single choice)**

Female / Male

**Qu.24. Education level (single choice)**

Primary school / Secondary school / Technical schools / Bachelor degree / Master-PhD degree

**Qu.25. Family status (single choice)**

Unmarried / Married / Parent

**Qu.26. Annual Family income level (single choice)**

<10,000 euros / 10,000 – 20,000 / 20,000 – 40,000 / >40,000 / Don't know

**Qu.27. Housing (single choice)**

Home ownership / Tenancy

**Qu.28. Profession (single choice)**

Public employee / Private employee / Freelance / Retire / Unemployed / Household / Student

**Qu.29. Municipality**

Free text

**Qu.30. Area of residence**

Free text
